# Supplementary material
Source: PubMed Central journal article supplement (PMC5835806)
Supplement: ajtr0010-0411-f7.pdf [file ajtr0010-0411-f7.pdf]

# Zhuangguguanjie protects articular cartilage

**Supplementary Table 1.** The score standards of osteoarthritic damage

| Grade | Osteoarthritic damage                                                                                     |
|-------|-----------------------------------------------------------------------------------------------------------|
| 0     | Normal                                                                                                    |
| 0.5   | Loss of Safranin-O without structural changes                                                             |
| 1     | Small fibrillations without loss of cartilage                                                             |
| 2     | Vertical clefts down to the layer immediately below the superficial layer and some loss of surface lamina |
| 3     | Vertical clefts/erosion to the calcified cartilage extending to <25% of the articular surface             |
| 4     | Vertical clefts/erosion to the calcified cartilage extending to 25-50% of the articular surface           |
| 5     | Vertical clefts/erosion to the calcified cartilage extending to 50-75% of the articular surface           |
| 6     | Vertical clefts/erosion to the calcified cartilage extending >75% of the articular surface                |

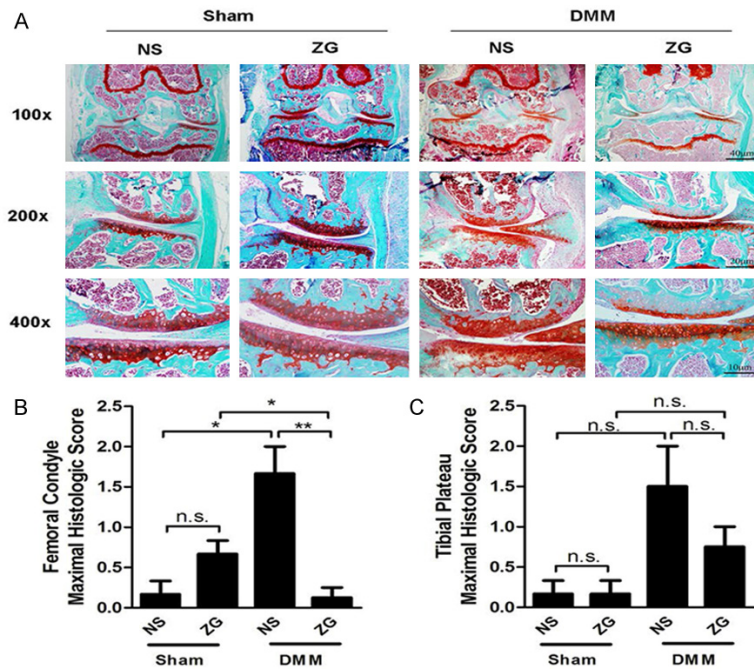

**Supplementary Figure 1.** ZG slows cartilage degeneration in DMM mice at 4<sup>th</sup> week. A. Joint histology in the DMM model. Knee joint tissue sections were from DMM mice following 4 weeks of treatment (ZG) and normal saline treatment (NS). Joint sections were stained with Safranin-O/fast green. Representative images of mouse joints are shown ( $n=8$  mice per time point). B. Maximal histological scores across the femoral condyle. C. Maximal histological scores across the tibial plateau. \* $P<0.05$ , \*\* $P<0.01$ , \*\*\* $P<0.001$ , n.s, no significant.
